# Supplementary material
Source: publisher site journal article supplement (https://www.dovepress.com/article/326461)
Supplement: Supplementary file 1 [file 326461 Revised Supplementary Case Report Form.pdf › 326461 Revised Supplementary Case Report Form.pdf]

## Demographics

Record ID

CPR number

Primary Investigator

- ☐ Aalborg  
☐ Skejby  
☐ Odense  
☐ Roskilde  
☐ Hillerød  
☐ Hvidovre  
☐ Rigshospitalet  
☐ Herlev  
(Investigator from including centre)

Type of CNS infection

- ☐ Bacterial meningitis  
☐ Viral meningitis  
☐ Encephalitis  
☐ Brain abscess  
☐ Neuroborreliosis  
☐ Neurosyphilis  
☐ Uncertain/unknown CNS infection entity  
☐ Other

Please describe

Previous CNS infection registered in DASGIB?

- ☐ Yes  
☐ No  
(To identify patients with multiple separate CNS infections in DASGIB)

Candidate for TRIM test study

- ☐ Yes  
☐ No

Bloodsample (RNA stabilisation tubes) taken

- ☐ Yes  
☐ No

Date and time of TRIM test blood sample?

Referred from doctor or admitted by 112/ambulance?

- ☐ Referred by doctor?  
☐ By alarming emergency services (ambulance) or patient shows up in A&E without referral?

Admission or referral diagnosis?

Day of admission

(First day of admission for this disease regardless of which department )

---

Admitted directly at centre ☐ Yes  
☐ No  
(Admitted directly at specialised ward/consulted with Dept. of Infectious diseases)

---

Hospital and department of primary admission?

---

---

Physical status before CNS infection? ☐ No physical/cognitive deficits  
☐ Mild physical/cognitive deficits  
☐ Moderate physical/cognitive deficits  
☐ Severe physical/cognitive deficits

---

---

Functional status before CNS infection? ☐ Full-time work/study  
☐ Part-time work/study  
☐ Unemployed  
☐ Disability pension/sick leave or other welfare based income  
☐ Retired, totally independent  
☐ Retired, dependent on some help  
☐ Retired, living in nursing home or equivalent  
☐ Vegetative state  
☐ Other  
☐ Not reported

---

Please specify?

---

---

Immunosuppression? ☐ None  
☐ Alcohol abuse  
☐ IV substance abuse  
☐ Organ transplant  
☐ Solid cancer (non-skin cancer except melanoma)  
☐ Haematological cancer  
☐ Diabetes mellitus  
☐ Asplenia  
☐ HIV  
☐ Prednisolone >7.5 mg/day  
☐ Primary immunodeficiency  
☐ Other immunosuppressive therapy  
(Please specify)

---

Please specify?

---

---

Relevant travel history within 30 days of debut of symptoms? ☐ Yes  
☐ No  
☐ Not reported

---

Please specify?

---

---

Duration of symptoms before admission?

---

((days))

# Bacterial meningitis incl. unknown pathogen

## Characteristics at admission?

Headache

- ☐ Yes  
☐ No  
☐ Not reported

Fever before admission?

- ☐ Yes  
☐ No  
☐ Not reported

Nausea/vomiting

- ☐ Yes  
☐ No  
☐ Not reported

Photophobia/phonophobia

- ☐ Yes  
☐ No  
☐ Not reported

Seizures before admission?

- ☐ Yes  
☐ No  
☐ Not reported

Confusion?

- ☐ Yes  
☐ No  
☐ Not reported

Neck stiffness

- ☐ Yes  
☐ No  
☐ Not reported

Petechiae?

- ☐ Yes  
☐ No  
☐ Not reported

Glasgow Coma Scale score at admission?

- ☐ 3  
☐ 4  
☐ 5  
☐ 6  
☐ 7  
☐ 8  
☐ 9  
☐ 10  
☐ 11  
☐ 12  
☐ 13  
☐ 14  
☐ 15  
☐ Could not be identified

Temperature at admission

\_\_\_\_\_  
(Celsius)

---

Pulse rate at admission

---

(Beats/min.)

---

Systolic blood pressure at admission

---

(mm Hg)

---

Diastolic blood pressure at admission?

---

(mm Hg)

---

Arterial blood gas within 4 hours of admission?

☐ Yes  
☐ No

---

Highest blood lactate on arterial puncture within 4 hours of admission?

---

---

Lowest pO<sub>2</sub> on arterial puncture within 4 hours of admission?

---

(kPa)

---

Lowest pCO<sub>2</sub> on arterial puncture within 4 hours of admission?

---

(kPa)

---

ICP measured at lumbar puncture

☐ Yes  
☐ No

---

What was the pressure?

---

(cm H<sub>2</sub>O)

---

Neurological deficits?

☐ Yes  
☐ No  
☐ Not reported

---

Neurological deficits, specify

☐ Cranial nerve paresis  
☐ Sensory/motor deficits  
☐ Other

---

Other neurological deficits, specify

---

---

Other relevant symptoms or findings?

---

**Microbiology**

Causative bacteria

- ☐ S. pneumoniae  
☐ N. meningitidis  
☐ L. monocytogenes  
☐ S. aureus  
☐ E. coli  
☐ H. influenzae  
☐ Other  
☐ Unidentified

Please specify which bacteria?  
  
\_\_\_\_\_

Positive CSF microscopy?

- ☐ Yes  
☐ No

Please specify

- ☐ Gram-positive cocci  
☐ Gram-negative cocci  
☐ Other

Please specify  
  
\_\_\_\_\_

Causative pathogen found in cultures?

- ☐ Yes  
☐ No

Positive culture specified

- ☐ CSF  
☐ Blood  
☐ Sputum  
☐ Ear  
☐ Sinus  
☐ Petechiae

Causative pathogen found by PCR based technology?

- ☐ Yes  
☐ No

Positive PCR, specify

- ☐ CSF  
☐ Blood

Antibody/antigen diagnosis?

- ☐ Yes  
☐ No  
(E.g. PUT, MAT etc)

Antibody/antigen diagnosis, please specify

- ☐ PUT  
☐ MAT  
☐ Other

Please specify, other diagnostics  
  
\_\_\_\_\_

**Treatment**

Pre-hospital antibiotics

- ☐ No  
☐ IV/IM on suspicion of meningitis  
☐ Oral  
☐ Don't know

Please specify pre-hospital iv/im treatment

---

Please specify pre-hospital oral treatment

---

Sepsis treatment initiated before meningitis treatment?

- ☐ Yes  
☐ No

Causative pathogen sensitive to empiric antibiotics for sepsis?

- ☐ Yes  
☐ No

Timing of sepsis treatment?

---

Time of empiric meningitis treatment

---

(Time of meningitis treatment)

Empiric antibiotic regimen for meningitis

- ☐ Benzylpenicillin  
☐ Ampicillin  
☐ Ceftriaxone  
☐ Cefotaxime  
☐ Meropenem  
☐ Other  
(In CNS dosages)

Please specify

---

Date of targeted antibiotic treatment for meningitis

---

Targeted antibiotic regimen for meningitis

- ☐ Benzylpenicillin  
☐ Ampicillin  
☐ Ceftriaxone  
☐ Cefotaxime  
☐ Meropenem  
☐ Other  
(In CNS dosages)

Please specify

---

Total days of antibiotic treatment for bacterial meningitis?

---

(Days)

Empiric aciclovir treatment until diagnosis was clear?

- ☐ Yes  
☐ No

Days of empiric aciclovir treatment?

\_\_\_\_\_  
(Days)

Adjuvant dexamethasone?

- ☐ Yes  
☐ No

Adjuvant dexamethasone within 4 hours of iv antibiotics?

- ☐ Yes  
☐ No

Steroid treatment in form of hydrocortisone for refractory shock?

- ☐ Yes  
☐ No

ENT specialist evaluation?

- ☐ Normal  
☐ Not normal  
☐ Not done

ENT evaluation, specify

\_\_\_\_\_

ICP management?

- ☐ None  
☐ Elevated bed rest (30 degrees)?  
☐ Respirator set to  $pCO_2 < 4.3$ ?  
☐ Hyperosmolar fluids (mannitol or hypertonic NaCl)?  
☐ External Ventricular drainage?  
☐ Craniotomy?  
☐ Other?

Please specify?

\_\_\_\_\_

### Complications during admission

Complications during admission

- ☐ None  
☐ Descending GCS  
☐ New onset neurological deficits  
☐ Seizures  
☐ Septic shock  
☐ DIC  
☐ Other organ failures

Persisting complications after admission

- ☐ None  
☐ Hearing loss not requiring hearing aid  
☐ Hearing loss requiring hearing aid  
☐ Cranial nerve palsy  
☐ Motor/sensory deficit  
☐ Seizures/epilepsy  
☐ Hydrocephalus  
☐ Cerebral infarction  
☐ Cognitive deficits  
☐ DIC sequelae  
☐ Other

---

Please specify

---



# Encephalitis/myelitis incl. unknown pathogen

## Predisposing conditions?

History of oral or genital herpes simplex?

- ☐ Yes  
☐ No  
☐ Not reported

History of herpes zoster?

- ☐ Yes  
☐ No  
☐ Not reported

History of insect bite/zoonotic exposure?

- ☐ Yes  
☐ No  
☐ Not reported

Other predisposing condition?

\_\_\_\_\_

## Clinical presentation

Headache

- ☐ Yes  
☐ No  
☐ Not reported

History of fever

- ☐ Yes  
☐ No  
☐ Not reported

Nausea/vomiting?

- ☐ Yes  
☐ No  
☐ Not reported

Meningealia

- ☐ Yes  
☐ No  
☐ Not reported  
(1 or more of neck stiffness, photo- or photophobia, fever, headache)

Seizures before or at admission?

- ☐ Yes  
☐ No  
☐ Not reported

---

GCS at admission

- ☐ 3  
☐ 4  
☐ 5  
☐ 6  
☐ 7  
☐ 8  
☐ 9  
☐ 10  
☐ 11  
☐ 12  
☐ 13  
☐ 14  
☐ 15  
☐ Could not be found

---

Temperature at admission

---

---

Personality changes?

- ☐ Yes  
☐ No  
☐ Not reported

---

Confusion or disorientation?

- ☐ Yes  
☐ No  
☐ Not reported

---

Other cognitive impairment?

- ☐ Yes  
☐ No  
☐ Not reported

---

Please specify?

---

---

Cranial nerve palsies?

- ☐ Yes  
☐ No  
☐ Not reported

---

Focal neurological deficit?

- ☐ Yes  
☐ No  
☐ Not reported

---

Please specify?

---

---

Aphasia?

- ☐ Yes  
☐ No  
☐ Not reported

---

Ataxia?

- ☐ Yes  
☐ No  
☐ Not reported

---

Gait disturbance?

- ☐ Yes  
☐ No  
☐ Not reported

Other neurological deficit? ☐ Yes  
☐ No

Please specify

---

Other relevant symptoms?

---

**Case definition for encephalitis by the International Encephalitis Consortium - Note: Not a requirement for inclusion in DASGIB**

Major criterion: Altered mental status >24 hours with no other explanation than encephalitis? ☐ Yes  
☐ No  
(Not required for inclusion in DASGIB)

Minor criteria for encephalitis?

- ☐ Documented fever >38 degrees Celsius within 72 hours before or after admission?
- ☐ New onset generalised or partial seizures with no other explanation?
- ☐ New onset focal neurological deficits?
- ☐ CSF WBC >5 cells/mL?
- ☐ New onset neuroimaging findings consistent with encephalitis?
- ☐ EEG consistent with encephalitis?

**Diagnostics**

CSF diagnostics performed?

- ☐ CSF culture for bacteria
- ☐ CSF pcr HSV, VZV, enterovirus
- ☐ HSV/VZV intrathecal index
- ☐ Autoimmune encephalitis antibodies in CSF
- ☐ Autoimmune encephalitis antibodies in blood
- ☐ TBE serology
- ☐ CSF for TB diagnostics (mic., culture, pcr)
- ☐ CSF borreliosis intrathecal antibody index
- ☐ CSF syphilis intrathecal antibody index
- ☐ CSF pcr for other viruses
- ☐ CSF 16s
- ☐ Other

Please specify

---

HIV test? ☐ Yes  
☐ No

HIV positive? ☐ Yes  
☐ No

EEG compatible with encephalitis? ☐ Yes  
☐ Uncertain findings  
☐ Normal  
☐ Not done

---

Microbiological diagnosis?

- ☐ HSV 1  
☐ HSV 2  
☐ VZV  
☐ Enterovirus  
☐ Unknown infectious encephalitis  
☐ HIV  
☐ CMV  
☐ EBV  
☐ Listeria  
☐ Tb  
☐ Other

---

Please specify

---

---

Causative pathogen diagnosis established by?

- ☐ No causative pathogen detected  
☐ PCR  
☐ Intrathecal antibody index  
☐ Serology  
☐ Other  
(key method to establish microbiological diagnosis)

---

Please specify?

---

---

### Treatment

Aciclovir treatment

- ☐ Yes  
☐ No

---

Date and time of i.v. aciclovir initiation

---

---

Total duration of iv aciclovir

---

(Days)

---

Follow-up with oral aciclovir/valaciclovir

- ☐ Yes  
☐ No

---

Duration of oral follow-up treatment

---

(Days)

---

Empiric antibiotic treatment for bacterial CNS infection?

- ☐ Yes  
☐ No

---

Days of empiric antibiotic treatment for CNS infection?

---

(Days)

---

Adjunctive corticosteroid treatment

- ☐ Yes  
☐ No

---

ICP treatment

- ☐ Yes  
☐ No

# Viral meningitis incl. unknown pathogen

## Predisposing conditions?

Oral or genital herpes? ☐ Yes  
☐ No  
☐ Not reported

Previous aseptic meningitis? ☐ Yes  
☐ No  
☐ Not relevant

Preceding or concomitant zoster? ☐ Yes  
☐ No  
☐ Not reported

Insect bite or other relevant animal exposure? ☐ Yes  
☐ No  
☐ Not reported

Virus-like disease among family and/or friends? ☐ Yes  
☐ No  
☐ Not reported

## Clinical presentation

Prodromal upper airway disease? ☐ Yes  
☐ No  
☐ Not reported

Prodromal GI disease ☐ Yes  
☐ No  
☐ Not reported  
(Viral gastroenteritis?)

Headache? ☐ Yes  
☐ No  
☐ Not reported

History of fever? ☐ Yes  
☐ No  
☐ Not reported

Photo- or phonophobia? ☐ Yes  
☐ No  
☐ Not reported

Nausea/vomiting? ☐ Yes  
☐ No  
☐ Not reported

Neck stiffness ☐ Yes  
☐ No  
☐ Not reported

Rash?

☐ Yes  
☐ No  
☐ Not reported

Please specify

\_\_\_\_\_

Other symptoms of relevance

☐ Yes  
☐ No

Please specify

\_\_\_\_\_

Temperature at admission

\_\_\_\_\_

GCS score at admission

☐ 3  
☐ 4  
☐ 5  
☐ 6  
☐ 7  
☐ 8  
☐ 9  
☐ 10  
☐ 11  
☐ 12  
☐ 13  
☐ 14  
☐ 15  
☐ Could not be identified

Neurological deficits

☐ Yes  
☐ No

Please specify

\_\_\_\_\_

### Diagnostics

CSF diagnostics performed

☐ CSF bacterial culture  
☐ CSF pcr for HSV, VZV, enterovirus  
☐ HSV/VZV Intrathecal index  
☐ Borrelia intrathecal index  
☐ Other

Please specify

\_\_\_\_\_

Other diagnostics performed?

☐ HIV test?  
☐ Screening for syphilis?

---

Microbiological diagnosis?

- ☐ HSV 1  
☐ HSV 2  
☐ VZV  
☐ Enterovirus  
☐ Borreliosis  
☐ TBE  
☐ Unknown pathogen  
☐ Other

---

Please specify

---

---

Aciclovir treatment initiated

- ☐ Yes  
☐ No

---

Date and time of start of aciclovir?

---

---

Date and time of stop of aciclovir?

---

---

Duration of iv aciclovir

---

(Days)

---

Follow-up with oral aciclovir/valaciclovir?

- ☐ Yes  
☐ No

---

Total duration of antiviral treatment (not HIV)

---

(Days)

---

Treated empirically with antibiotics for bacterial meningitis at admission or lumbar puncture?

- ☐ Yes  
☐ No

---

Date and time of start of empiric antibiotics for meningitis?

---

---

Date and time of stop of empiric antibiotics for meningitis?

---

---

Days of empiric antibiotic treatment for bacterial CNS infection?

---

(Days)

---

Adjunctive corticosteroids

- ☐ Yes  
☐ No

---

Other antiviral/antibacterial/antiparasitic treatment?

- ☐ Yes  
☐ No

---

Please specify

---



# Brain Abscess incl. unknown pathogen

## Predisposing conditions and risk factors

Predisposing or concomittant infection(s)?

- ☐ None
- ☐ Ear infection
- ☐ Sinusitis
- ☐ Dental infection
- ☐ Other contiguous infection
- ☐ Endocarditis
- ☐ Bacteremic spread of systemic infection
- ☐ Preceding meningitis
- ☐ Other

Please specify?

---

Other predisposing risk factors

- ☐ None
- ☐ Neurosurgery/ENT surgery
- ☐ Head trauma
- ☐ Predisposing heart condition
- ☐ Immunocompromise
- ☐ Arterio-venous malformations (e.g. pulmonary etc)
- ☐ Liver cirrhosis
- ☐ Malignancy
- ☐ Other

Specify type of surgery

---

Date of predisposing surgery?

---

Please specify type of trauma?

---

Date of predisposing trauma?

---

Please specify

---

**Clinical presentation at admission**

Headache? ☐ Yes  
☐ No  
☐ Not reported

Seizures before/at admission ☐ Yes  
☐ No  
☐ Not reported

Nausea/vomiting? ☐ Yes  
☐ No  
☐ Not reported

History of fever? ☐ Yes  
☐ No  
☐ Not reported

Cognitive impairment? ☐ Yes  
☐ No  
☐ Not reported

Personality changes? ☐ Yes  
☐ No  
☐ Not reported

Photo- or phonophobia? ☐ Yes  
☐ No  
☐ Not reported

Neck stiffness? ☐ Yes  
☐ No  
☐ Not reported

Cranial nerve palsy? ☐ Yes  
☐ No  
☐ Not reported

Paresis or sensory nerve deficit? ☐ Yes  
☐ No  
☐ Not reported

Aphasia? ☐ Yes  
☐ No  
☐ Not reported

Ataxia? ☐ Yes  
☐ No  
☐ Not reported

Gait disturbance? ☐ Yes  
☐ No  
☐ Not reported

Other neurological deficit? ☐ Yes  
☐ No

---

Please specify any other neurological deficits?

---

---

Temperature at admission?

---

---

GCS at admission?

- ☐ 3  
☐ 4  
☐ 5  
☐ 6  
☐ 7  
☐ 8  
☐ 9  
☐ 10  
☐ 11  
☐ 12  
☐ 13  
☐ 14  
☐ 15  
☐ Could not be found

---

Systolic blood pressure at admission?

---

(mm Hg)

---

---

Diastolic blood pressure at admission?

---

(mm Hg)

---

### Diagnostics

Causative pathogen(s)

---

---

Diagnosis based upon (select several if applicable)

- ☐ Imaging and aspiration of pus (microbiology negative)  
☐ Brain abscess culture positive  
☐ Brain abscess PCR-based positive  
☐ Imaging and blood culture positive  
☐ Imaging and other relevant sample culture/pcr positive  
☐ Imaging and serology  
☐ Imaging and clinical response to treatment  
☐ Other

---

Please provide details?

---

---

PCR of brain absces?

- ☐ Yes  
☐ No

---

Multiple abscesses?

- ☐ Yes  
☐ No

---

How many?

---

---

Size of abscess at diagnosis (largest)

---

(Largest diameter in cm)

---

Location(s) of abscess(es)?

- ☐ Frontal
- ☐ Temporal
- ☐ Parietal
- ☐ Occipital
- ☐ Mesencephalon
- ☐ Cerebellum
- ☐ Brainstem
- ☐ Other location

---

Please specify?

---

Aspiration/excision of brain abscess?

- ☐ Yes
- ☐ No

---

Type of intervention for diagnosis and/or treatment?

- ☐ Aspiration
- ☐ Stereotactic aspiration
- ☐ Craniotomy with aspiration
- ☐ Excision
- ☐ Other

---

Date of first procedure?

---

Repeated aspirations/excisions performed?

- ☐ Yes
- ☐ No

---

Date of second neurosurgical procedure?

---

How many neurosurgical procedures?

---

Please describe types and order of neurosurgical procedures performed?

---

Reasons for neurosurgical interventions (aspiration, excision, other)

- ☐ Diagnostic purposes only
- ☐ Size of abscess
- ☐ Impending rupture of abscess
- ☐ Number of abscesses
- ☐ Mass effect
- ☐ Increasing volume of abscess during antibiotic treatment
- ☐ Newly formed abscesses during treatment
- ☐ Abscess not responding to antibiotics alone
- ☐ Hydrocephalus
- ☐ Ventriculitis
- ☐ Other

---

Please specify

**Treatment**

Antibiotic therapy for infection other than brain abscess before culture of brain abscess?

- ☐ Yes  
☐ No  
☐ Not reported  
(E.g. sepsis, pneumonia, UTI etc)

Please specify type, dosage and duration and timing before neurosurgical aspiration/excision?

\_\_\_\_\_

Antibiotic therapy for brain abscess before culture of brain abscess?

- ☐ Yes  
☐ No

Empiric antibiotic regimen for brain abscess

\_\_\_\_\_  
(Not including sepsis treatment before diagnosis)

Start of empirical antibiotics for brain abscess?

\_\_\_\_\_  
(Dosage and spectrum for abscess)

Final antibiotic regimen for brain abscess?

\_\_\_\_\_

Start of final antibiotic regimen for brain abscess?

\_\_\_\_\_

Stop of iv treatment?

\_\_\_\_\_  
(Days)

Consolidation therapy with oral antibiotics?

- ☐ Yes  
☐ No  
☐ Not reported

Type of oral antibiotics?

\_\_\_\_\_

Stop of oral antibiotics?

\_\_\_\_\_  
(Days)

Adjunctive corticosteroids

- ☐ Yes  
☐ No

Duration of adjunctive corticosteroids

\_\_\_\_\_  
(Days)

Other neurosurgical treatment

- ☐ Yes  
☐ No

---

Types of other neurosurgical treatments

- ☐ Intracranial pressure monitoring device  
☐ Ventricular external drainage  
☐ Ventricular shunt  
☐ Other

---

Please specify

---

---

Intrathecal antibiotics?

- ☐ Yes  
☐ No

---

Anticonvulsive treatment during hospitalisation

- ☐ Yes  
☐ No

---

Anticonvulsive treatment at discharge?

- ☐ Yes  
☐ No

---

Anticonvulsive treatment at follow-up?

- ☐ Yes  
☐ No

---

### Complications during treatment

---

Complications during treatment

- ☐ No complications  
☐ Intraventricular rupture  
☐ Hydrocephalus  
☐ Sub- or epidural empyema  
☐ Seizures  
☐ Cerebral infarction  
☐ Venous sinus thrombophlebitis  
☐ Other

---

Please specify?

---

---

Date of onset/diagnosis of complications?

---

---

New onset complications at follow-up (e.g. seizures)?

---

# Neuroborreliosis incl. suspected neuroborreliosis

## Predisposing conditions

History of tick-bite

- ☐ Yes  
☐ No  
☐ Not reported

Date of tick-bite?

\_\_\_\_\_

Time of tick-bite before admission?

- ☐ Don't know  
☐ 0-14 days  
☐ 15-28 days  
☐ 29-120 days  
☐ 121-180 days  
☐ 181-365 days  
☐ >1 year

History of erythema migrans?

- ☐ Yes  
☐ No  
☐ Not reported

Date of debut of erythema migrans

\_\_\_\_\_

Time of erythema migrans before admission?

- ☐ Don't know  
☐ 0-14 days  
☐ 15-28 days  
☐ 29-120 days  
☐ 121-180 days  
☐ 181-365 days  
☐ >1 year

## Clinical presentation

Erythema migrans at admission?

- ☐ Yes  
☐ No

Headache?

- ☐ Yes  
☐ No  
☐ Not reported

Temperature at admission?

\_\_\_\_\_

Cranial nerve palsy?

- ☐ Yes  
☐ No  
☐ Not reported

Which cranial nerves?

- ☐ Nervus facialis  
☐ Nervus abducens  
☐ Other

---

Please specify?

---

---

Bilateral

- ☐ Yes  
☐ No
- 

---

Extracranial neurological deficits?

- ☐ Yes  
☐ No  
☐ Not reported
- 

---

Please describe neurological deficits?

- ☐ Paresis/paralysis  
☐ Sensory deficits/pain  
☐ Other
- 

---

Please specify?

---

---

Location of extra-cranial deficit?

- ☐ Left arm  
☐ Right arm  
☐ Left leg  
☐ Right leg  
☐ Thorax  
☐ Abdomen  
☐ Pelvic/sacral region  
☐ Other location
- 

---

Please describe

---

---

Encephalitis?

- ☐ Yes  
☐ No  
(Very rare)
- 

---

Please elaborate?

---

---

Other neurological deficits?

- ☐ Yes  
☐ No  
☐ Not reported
- 

---

Please specify?

---

---

Meningeal?

- ☐ Yes  
☐ No  
☐ Not reported  
(Rare, usually young children)
- 

---

Other relevant symptoms/findings

---



**Diagnosis**

Diagnosis of neuroborreliosis

- ☐ Positive CSF intrathecal antibody index IgG  
☐ Positive CSF intrathecal antibody index IgM  
☐ CXCL-13  
☐ Clinical diagnosis without laboratory confirmation  
☐ Other

CSF Borrelia IgG index?

---

(Value)

CSF Borrelia IgM index?

---

(Value)

Please specify

Serum borrelia IgG positive?

- ☐ Yes  
☐ No

Serum borrelia IgM positive

- ☐ Yes  
☐ No

ECG performed

- ☐ Yes  
☐ No

New AV-block

- ☐ Yes  
☐ No

**Treatment and course of admission**

Initial antibiotics for neuroborreliosis?

- ☐ Benzylpenicillin  
☐ Ceftriaxon  
☐ Doxycyclin  
☐ Other betalactam  
☐ Other non-betalactam

Dosage of antibiotic?

Switch to oral treatment during course?

- ☐ Yes  
☐ No

Which drug?

- ☐ Doxycyclin  
☐ Other

Dosage?

Please specify?

---

Total duration of iv treatment

---

---

Total duration of antibiotic therapy for neuroborreliosis

---

---

Longterm follow-up at 1-3 months?

- ☐ Yes  
☐ No  
☐ Not reported

---

Regression of symptoms at discharge?

- ☐ Complete regression of symptoms  
☐ Only mild symptoms  
☐ Moderate symptoms (e.g. persisting slight lagophthalmos or continued need for paracetamol/NSAID)  
☐ Severe (e.g. persisting lagophthalmos, continued need for membrane-stabilizing analgetics for neuropathic pain, or cognitive impairment leading to sick leave)  
☐ No improvement in symptoms since admission

---

Long-term sequelae at 3 months follow-up?

- ☐ Complete regression of symptoms  
☐ Only mild symptoms  
☐ Moderate symptoms (e.g. persisting slight lagophthalmos or continued need for paracetamol/NSAID)  
☐ Severe (e.g. persisting lagophthalmos, continued need for membrane-stabilizing analgetics for neuropathic pain, or cognitive impairment leading to sick leave)  
☐ No improvement in symptoms since admission

---

Character of persisting symptoms at 3 months follow-up?

- ☐ Cranial nerve paresis  
☐ Radicular pains  
☐ Extremity paresis or sensory deficits  
☐ Headache  
☐ Fatigue  
☐ Concentration or attention difficulties  
☐ Other

---

Please specify persisting neurological symptoms?

---

# Neurosyphilis incl. suspected neurosyphilis

## Exposures and risk factors

HIV test?

- ☐ Yes  
☐ No

Mode of transmission

- ☐ MSM  
☐ Bisexual  
☐ Heterosexual  
☐ Contact with prostitute

Place of transmission

- ☐ Domestic  
☐ Abroad

Please specify

---

Other venereal disease at time of diagnosis

- ☐ Yes  
☐ No  
(Not HIV)

Please specify

---

## Clinical presentation

Patient history includes signs/symptoms of

- ☐ Primary genital lesion  
☐ Primary lesion elsewhere  
☐ Secondary syphilis including generalized rash  
☐ Lymph node enlargement  
☐ Weight loss  
☐ Fatigue  
☐ Visual disturbances  
☐ Otogenic symptoms  
☐ Neurological deficits  
☐ Other

Please specify

---

## Diagnosis

Clinical entity (summarised clinical presentation based upon symptoms and diagnostic procedures)?

- ☐ Meningitis  
☐ Meningovascular disease  
☐ Focal neurological deficits incl. general paresis  
☐ Tabes dorsalis  
☐ Gummatous neurosyphilis  
☐ Ocular neurosyphilis  
☐ Otogenic neurosyphilis  
☐ Other neurological syphilitic disease  
☐ Asymptomatic neurological disease

---

Please specify?

---

---

Please specify?

---

---

Diagnosis is based upon

- ☐ Positive intrathecal index  
☐ Positive serology and pleocytosis  
☐ Other
- 

Please specify

---

---

Concomittant syphilitic lesions/disease outside the CNS?

- ☐ Yes  
☐ No
- 

Please specify?

---

### Treatment and course of admission

---

Initial iv antibiotics for neurosyphilis?

- ☐ Benzylpenicillin  
☐ Ceftriaxon  
☐ Doxycyclin  
☐ Other betalactam  
☐ Other non-betalactam
- 

Please specify?

---

---

Switch to oral treatment during course?

- ☐ Yes  
☐ No
- 

Which drug?

- ☐ Doxycyclin  
☐ Other
- 

Please specify

---

---

Total duration of iv treatment

---

(Days)

---

---

Total duration of antibiotic therapy for neurosyphilis

---

(Days. Omit if treatment is iv only (see above))

---

---

Long-term sequelae at 6 months follow-up?

- ☐ Yes  
☐ No  
☐ Not reported  
☐ Lost to follow-up

---

Intensity of persisting symptoms at 6 after end of treatment?

- ☐ Only mild symptoms  
☐ Moderate symptoms  
☐ Severe symptoms  
☐ No improvement in symptoms at all

---

Character of persisting sequelae at 6 months after end of treatment?

- ☐ Fatigue  
☐ Headache  
☐ Concentration or attention difficulties  
☐ Other

---

Please specify

\_\_\_\_\_

---

Lumbar puncture after 6 months of treatment?

- ☐ Yes  
☐ No

---

Normalisation of CSF-leukocytes?

- ☐ Yes  
☐ No

---

Satisfactory decrease in treponemal and non-treponemal tests?

- ☐ Yes  
☐ No

---

Please specify?

\_\_\_\_\_

## Other CNS infections

### Clinical presentation

Presumed but unverified type of CNS infection?

- ☐ Bacterial meningitis
- ☐ Encephalitis/myelitis
- ☐ Aseptic meningitis
- ☐ Brain abscess
- ☐ Neuroborreliosis
- ☐ Neurosyphilis
- ☐ Autoimmune encephalitis
- ☐ Not applicable

Please elaborate

---

Symptoms and findings at admission

- ☐ Headache
- ☐ Fever (patient history)
- ☐ Nausea/vomiting
- ☐ Neck stiffness
- ☐ Photophobia
- ☐ Phonophobia
- ☐ Cranial nerve palsy
- ☐ Motor nerve deficit
- ☐ Sensory nerve deficit
- ☐ Visuo/ocular disturbances
- ☐ Gait disturbance
- ☐ Monoradiculitis
- ☐ Polyradiculitis
- ☐ Other

Please specify

---

Temperature at admission

---

GCS at admission

- ☐ 3
- ☐ 4
- ☐ 5
- ☐ 6
- ☐ 7
- ☐ 8
- ☐ 9
- ☐ 10
- ☐ 11
- ☐ 12
- ☐ 13
- ☐ 14
- ☐ 15
- ☐ Could not be found

Systolic blood pressure at admission

---

**Diagnostics**

Diagnostic tests performed

- ☐ CSF culture for bacteria
- ☐ CSF pcr HSV, VZV, enterovirus
- ☐ CSF pcr for bacteria (multiplex or 16S)
- ☐ CSF mic., pcr, culture for mycobacteria
- ☐ CSF intrathecal index HSV/VZV
- ☐ CSF intrathecal index borreliosis
- ☐ CSF intrathecal index syphilis
- ☐ Autoimmune encephalitis antibodies in CSF
- ☐ Other CSF diagnostics
- ☐ Blood culture
- ☐ Blood pcr for bacteria
- ☐ Blood pcr for virus
- ☐ Blood serology
- ☐ Autoimmune encephalitis antibodies in blood
- ☐ Other tests

Please specify

---

Please specify

---

Please specify

---

Please specify

---

HIV test?

- ☐ Yes
- ☐ No

EEG performed

- ☐ Yes
- ☐ No

**Treatment**

Empirical antibiotic treatment for CNS infection?

- ☐ Yes
- ☐ No

Timing of antibiotic treatment

---

Empirical aciclovir initiated

- ☐ Yes
- ☐ No

Timing of empirical aciclovir treatment

---

(IV only)

Duration of iv aciclovir treatment

---

(Days)

---

Total duration of aciclovir treatment (iv+po)?

\_\_\_\_\_  
(Days)

---

Other empirical antimicrobial treatment?

\_\_\_\_\_

---

Adjunctive corticosteroid therapy

☐ Yes  
☐ No

---

Other treatment directed at raised ICP (intracranial pressure)

☐ Yes  
☐ No



## Laboratory data

Stored samples for biobank?

- ☐ Yes  
☐ No

Which samples?

- ☐ CSF  
☐ Blood  
☐ Purified DNA (Skejby)

### CSF - biochemistry at diagnosis

Date of lumbar puncture

\_\_\_\_\_  
(Time of lumbar puncture)

CSF leukocytes (no./ml)

\_\_\_\_\_  
(10E6/L)

CSF polymorphnuclear leukocytes

\_\_\_\_\_  
(10E6/L)

CSF mononuclear leukocytes

\_\_\_\_\_  
(10E6/L)

CSF erythrocytes

\_\_\_\_\_  
(10E6/L)

CSF glucose

\_\_\_\_\_  
(mmol/L)

B-glucose (at time of lumbar puncture

\_\_\_\_\_  
(mmol/L)

CSF protein (g/L)

\_\_\_\_\_  
(g/L)

CSF lactate

\_\_\_\_\_  
(mmol/L)

Several lumbar punctures performed?

- ☐ Yes  
☐ No

Please clarify indication and results?

\_\_\_\_\_

**Blood biochemistry - day of admission**

Blood culture during initial course of disease?

☐ Yes  
☐ No

Date of (first) blood culture

---

Blood culture positive (first blood culture)?

☐ Yes  
☐ No

C-reactive protein (mg/l)

---

B-leukocytes

---

  
(10E9/L)

B-neutrophils

---

  
(10E9/L)

B-haemoglobin

---

  
(mmol/L)

B-thrombocytes

---

  
(10E9/L)

P-creatinine

---

  
(Micromol/L)

INR

---

# Radiology results

---

Diagnostic imaging performed

- ☐ Yes  
☐ No

---

Diagnostic imaging

- ☐ Cranial CT  
☐ Cranial MRI  
☐ Chest x-ray  
☐ MR columna  
☐ Angiography  
☐ Other

---

New pathology on cranial imaging?

- ☐ Normal  
☐ Brain infarction  
☐ Brain haemorrhage  
☐ Brain oedema incl. generalized  
☐ Signs of herniation  
☐ Brain abscess  
☐ Sub- or epidural empyema  
☐ Hydrocephalus (obstructive or communicating)  
☐ Encephalitic changes  
☐ Sinus/ear/mastoid opacity  
☐ Cranial defect and/or CSF leakage  
☐ CNS malignancy  
☐ Benign CNS tumour  
☐ Intracranial vasculitis  
☐ Brain cyst or hygroma  
☐ ADEM  
☐ Ventriculitis  
☐ Other

---

Date of diagnosis of infarction?

---

(date of scan)

---

Location in brain?

- ☐ Frontal lobe  
☐ Parietal lobe  
☐ Temporal lobe  
☐ Occipital lobe  
☐ Cerebellum  
☐ Brain stem  
☐ Other deep structures incl. basal ganglia

---

Diagnosed by CT or MRI?

- ☐ Neither  
☐ CT  
☐ MRI  
☐ Both

---

Date of diagnosis of haemorrhage?

---

(date of scan)

---

Location in brain?

- ☐ Epidural intracranial
- ☐ Subdural intracranial
- ☐ SAH
- ☐ Intraventricular haemorrhage
- ☐ Frontal lobe
- ☐ Parietal lobe
- ☐ Temporal lobe
- ☐ Occipital lobe
- ☐ Cerebellum
- ☐ Brain stem
- ☐ Other deep structures incl. basal ganglia

---

Diagnosed by CT or MRI?

- ☐ Neither
- ☐ CT
- ☐ MRI
- ☐ Both

---

Date of diagnosis of brain oedema?

\_\_\_\_\_

(date of scan)

---

Location in brain?

- ☐ Generalised
- ☐ Frontal lobe
- ☐ Parietal lobe
- ☐ Temporal lobe
- ☐ Occipital lobe
- ☐ Cerebellum
- ☐ Brain stem
- ☐ Other deep structures incl. basal ganglia

---

Diagnosed by CT or MRI?

- ☐ Neither
- ☐ CT
- ☐ MRI
- ☐ Both

---

Date of diagnosis of cerebral herniation?

\_\_\_\_\_

---

Diagnosed by CT or MRI?

- ☐ Neither
- ☐ CT
- ☐ MRI
- ☐ Both

---

Date of diagnosis of brain abscess?

\_\_\_\_\_

---

Location in brain?

- ☐ Frontal lobe
- ☐ Parietal lobe
- ☐ Temporal lobe
- ☐ Occipital lobe
- ☐ Cerebellum
- ☐ Brain stem
- ☐ Other deep structures incl. basal ganglia

---

Diagnosed by CT or MRI?

- ☐ Neither
- ☐ CT
- ☐ MRI
- ☐ Both

---

Date of diagnosis of empyema?

---

---

Location in brain?

- ☐ Epidural  
☐ Subdural

---

Diagnosed by CT or MRI?

- ☐ Neither  
☐ CT  
☐ MRI  
☐ Both

---

Date of diagnosis of hydrocephalus?

---

---

Type of hydrocephalus

- ☐ Communicating  
☐ Obstructive

---

Diagnosed by CT or MRI?

- ☐ Neither  
☐ CT  
☐ MRI  
☐ Both

---

Date of diagnosis of encephalitic changes?

---

---

Location in brain?

- ☐ Frontal lobe  
☐ Parietal lobe  
☐ Temporal lobe  
☐ Occipital lobe  
☐ Cerebellum  
☐ Brain stem  
☐ Other deep structures incl. basal ganglia

---

Diagnosed by CT or MRI?

- ☐ Neither  
☐ CT  
☐ MRI  
☐ Both

---

Date of diagnosis of opacity?

---

---

Location?

- ☐ Inner ear  
☐ Mastoid  
☐ Sinuses

---

Diagnosed by CT or MRI?

- ☐ Neither  
☐ CT  
☐ MRI  
☐ Both

---

Date of diagnosis of cranial defect?

---

---

Diagnosed by CT or MRI?

- ☐ Neither  
☐ CT  
☐ MRI  
☐ Both

---

Date of diagnosis of CNS malignancy?

---

---

Location in brain?

- ☐ Frontal lobe
- ☐ Parietal lobe
- ☐ Temporal lobe
- ☐ Occipital lobe
- ☐ Cerebellum
- ☐ Brain stem
- ☐ Other deep structures incl. basal ganglia

---

Diagnosed by CT or MRI?

- ☐ Neither
- ☐ CT
- ☐ MRI
- ☐ Both

---

Date of diagnosis of benign CNS tumour?

---

---

Location in brain?

- ☐ Frontal lobe
- ☐ Parietal lobe
- ☐ Temporal lobe
- ☐ Occipital lobe
- ☐ Cerebellum
- ☐ Brain stem
- ☐ Other deep structures incl. basal ganglia

---

Diagnosed by CT or MRI?

- ☐ Neither
- ☐ CT
- ☐ MRI
- ☐ Both

---

Date of diagnosis of intracranial vasculitis?

---

---

Please describe location?

---

---

Diagnosed by CT or MRI?

- ☐ Neither
- ☐ CT
- ☐ MRI
- ☐ Both

---

Date of diagnosis of hygroma or cyst?

---

---

Location in brain?

- ☐ Frontal lobe
- ☐ Parietal lobe
- ☐ Temporal lobe
- ☐ Occipital lobe
- ☐ Cerebellum
- ☐ Brain stem
- ☐ Other deep structures incl. basal ganglia

---

Diagnosed by CT or MRI?

- ☐ Neither  
☐ CT  
☐ MRI  
☐ Both
- 

Date of diagnosis of ADEM?

---

---

Location in brain?

- ☐ Frontal lobe  
☐ Parietal lobe  
☐ Temporal lobe  
☐ Occipital lobe  
☐ Cerebellum  
☐ Brain stem  
☐ Other deep structures incl. basal ganglia
- 

Diagnosed by CT or MRI?

- ☐ Neither  
☐ CT  
☐ MRI  
☐ Both
- 

Date of diagnosis of venticulitis?

---

---

Diagnosed by CT or MRI?

- ☐ Neither  
☐ CT  
☐ MRI  
☐ Both
- 

Date of first cranial CT

---

(Date of first cranial CT)

---

Use of contrast (first scan)?

- ☐ Yes  
☐ No
- 

Results of cranial CT?

---

(Radiologist description)

---

Total number of cranial CT during admission?

---

---

Date of cranial MRI

---

(Date of first cranial MRI)

---

Use of contrast?

- ☐ Yes  
☐ No
- 

Cranial MRI results

---

(Radiologist description)

---

Total number of cranial MRI during admission?

---

---

Chest x-ray at admission?

- ☐ Normal/no new relevant findings  
☐ Pneumonic infiltrate  
(Other relevant findings can be listed in  
"comments")
- 

Results of MR columnna?

---

Results of angiography?

---

Other relevant imaging

---



## Outcome data

---

Admission intensive care unit?

- ☐ Yes  
☐ No

---

ICU management

- ☐ Assisted ventilation (incl. respirator)  
☐ Vasopressor  
☐ Dialysis  
☐ ICP monitoring  
(Please specify interventions)

---

Initial ICP level

\_\_\_\_\_

(mm Hg)

---

Maximum ICP measured?

\_\_\_\_\_

(mm Hg)

---

GOS score at discharge

- ☐ 1  
☐ 2  
☐ 3  
☐ 4  
☐ 5

---

GOS score at 1 month follow-up?

- ☐ 1  
☐ 2  
☐ 3  
☐ 4  
☐ 5

---

GOS score at 3 months follow-up

- ☐ 1  
☐ 2  
☐ 3  
☐ 4  
☐ 5

---

GOS score at 6 months follow-up

- ☐ 1  
☐ 2  
☐ 3  
☐ 4  
☐ 5

---

Date of last follow-up within the first year after diagnosis?

\_\_\_\_\_

---

Neuropsychological evaluation after treatment

- ☐ Not done  
☐ MOCA score  
☐ Full neuropsychological evaluation  
☐ Other

---

MOCA score result?

\_\_\_\_\_

---

Please specify results of neuropsychological tests?

\_\_\_\_\_

---

Date of death

---

---

General comments on patient?

---
